# Supplementary material for: Visible-light-driven water oxidation at a polychromium-oxo-electrodeposited TiO2 electrode as a new type of earth-abundant photoanode
Source: Royal Society of Chemistry journal article supplement (doi:10.1039/c3cc47764a), 2013-11-22
Supplement: c3cc47764a.pdf [file c3cc47764a.pdf]

## Electronic Supplementary Information

### **Visible-Light-Driven Water Oxidation at a Polychromium-Oxo-Electrodeposited TiO<sub>2</sub> Electrode as a New Type of Earth-Abundant Photoanode**

Masashi Kajita<sup>†</sup>, Kenji Saito<sup>†</sup>, Naoto Abe<sup>†</sup>, Akinori Shoji<sup>†</sup>, Kazuki Matsubara<sup>†</sup>,

Tatsuto Yui<sup>†</sup>, Masayuki Yagi<sup>\*,†,§</sup>

<sup>†</sup> Department of Materials Science and Technology, Faculty of Engineering and Center for Transdisciplinary Research, Niigata University, 8050 Ikarashi-2, Niigata 950-2181, Japan

<sup>§</sup> PRESTO, Japan Science and Technology Agency, 4-1-8 Honcho, Kawaguchi, Saitama 332-0012, Japan

E-mail: yagi@eng.niigata-u.ac.jp

#### **Supporting Information**

1. Experimental details.
2. Characterization of the pre-treated solution.
3. Characterization of the polychromium-oxo (Cr<sup>III</sup><sub>x</sub>O<sub>y</sub>)-deposited TiO<sub>2</sub> electrode.
4. Photocurrent responses and photoelectrocatalysis on the Cr<sup>III</sup><sub>x</sub>O<sub>y</sub>-deposited TiO<sub>2</sub> electrode.

## 1. Experimental details.

### Materials

Titanium dioxide (TiO<sub>2</sub>) paste (JGC Catalyst and Chemicals Ltd., PST-18NR), chromium (III) nitrate nonahydrate and all other reagents were purchased and used as received. ITO-coated glass (< 10 Ω/□ of a sheet resistance) was purchased from AGC Fabritech Co. Ltd. Deionized water was used for all the experiments.

### Preparation

#### *TiO<sub>2</sub> electrode*

TiO<sub>2</sub> paste was coated on an ITO substrate (1.0 cm<sup>2</sup> area) by a baker film applicator and then air-dried for 60 min. It was calcined at 723 K for 60 min to form a TiO<sub>2</sub>-coated ITO substrate.

#### *Cr<sup>III</sup><sub>x</sub>O<sub>y</sub>-deposited TiO<sub>2</sub> electrode*

Typically, an aqueous chromium (III) nitrate solution (0.14 mol L<sup>-1</sup>, 10 mL) was pre-treated by cathodic polarization of a platinum plate electrode (2.0 cm<sup>2</sup> area) at -0.74 V vs. Ag/AgCl for 2 h. The pre-treated Cr(NO<sub>3</sub>)<sub>3</sub> solution was characterized by UV-visible absorption, and Raman spectroscopic techniques (see text). A polychromium-oxo layer was cathodically electrodeposited on a TiO<sub>2</sub> electrode at -0.74 V vs. Ag/AgCl in the pre-treated Cr(NO<sub>3</sub>)<sub>3</sub> solution for 6 h to give polychromium-oxo-deposited TiO<sub>2</sub> electrode. It was characterized by UV-visible absorption, XPS, Raman spectroscopic, SEM and EDS techniques.

#### *Cr<sub>2</sub>O<sub>3</sub> powder*

Cr<sub>2</sub>O<sub>3</sub> powder was chemically prepared as follows. An 0.3 mol L<sup>-1</sup> aqueous sodium hydroxide solution (5 mL) was slowly dropped into an 0.14 mol L<sup>-1</sup> aqueous chromium(III) nitrate solution (5 mL) to give Cr<sub>2</sub>O<sub>3</sub> powder. It was repeatedly washed with water to remove sodium nitrate, and then dried at 80°C for overnight.

#### *TiO<sub>2</sub> electrode with Cr<sub>2</sub>O<sub>3</sub> deposited chemically*

A TiO<sub>2</sub> electrode with Cr<sub>2</sub>O<sub>3</sub> deposited chemically was prepared as follows. An 0.14 mol L<sup>-1</sup> aqueous chromium(III) nitrate solution (50 μL) followed by an 0.3 mol L<sup>-1</sup>

aqueous sodium hydroxide solution (50  $\mu\text{L}$ ) was slowly dropped onto the  $\text{TiO}_2$  electrode. The electrode was air-dried for several hours and then dried at  $80^\circ\text{C}$  for overnight to give a  $\text{TiO}_2$  electrode with  $\text{Cr}_2\text{O}_3$  deposited chemically.

## Measurements

UV-visible absorption spectra were measured using a photodiode array spectrophotometer (Shimadzu, Multispec-1500). UV-visible diffuse reflectance spectra were measured using an UV-visible spectrophotometer (JASCO V-550) in a diffuse reflectance mode. Raman spectra were measured using a Raman spectrophotometer (Horiba, Lab RAM HR) using 532 nm excitation and silicon standard wavenumber ( $520.7\text{ cm}^{-1}$ ). A scanning electron microscopic (SEM) data and energy dispersive X-ray spectroscopy (EDS) data were recorded using a scanning electron microscope (JEOL, JSM-6510LV). For analysis of the chromium amount deposited, polychromium-oxo-electrodeposited  $\text{TiO}_2$  on the ITO electrode was dissolved in an aqua regia, and the chromium amount in the dissolved solution was measured using an inductively coupled plasma mass (ICP-MS) spectrometer (Yokogawa, HP4500). X-ray photoelectron spectroscopic (XPS) data were taken using an X-ray photoelectron spectrometer (JEOL, JPS-9000). Electrochemical experiments were conducted in a  $0.1\text{ mol L}^{-1}$  phosphate buffer solution ( $\text{Na}_2\text{HPO}_4 + \text{KH}_2\text{PO}_4$ ,  $\text{pH} = 7$ ) in an electrochemical cell equipped with a working electrode, a platinum wire counter electrode and an  $\text{Ag}/\text{AgCl}$  reference electrode using an electrochemical analyzer (Hokuto denko, HZ-3000). All the electrochemical and photoelectrochemical experiments were carried out under argon atmosphere at 298 K. A 500 W Xenon lamp (Ushio, UXL-500SX, lamp house: SX-U1500XG) with 420 nm band-pass filter or a 150 W halogen lamp (Tokina, KTS-150RSV) with a L42 UV-cut-filter ( $\lambda < 420\text{ nm}$  cutoff) were used for photoelectrochemical measurements. A 500 W Xenon lamp with monochromator (Bunkoukeiki, M10) was used for incident photon-to-current efficiency (IPCE) measurement. The IPCE values were calculated according to Eq. (1),

$$\text{IPCE} = \frac{1.24 \times 10^{-6} J}{P \lambda} \quad (1)$$

where  $J$ ,  $P$  and  $\lambda$  are a photocurrent density ( $\text{A cm}^{-2}$ ), light intensity ( $\text{W cm}^{-2}$ ) and wavelength (m). Initial internal quantum efficiency for oxygen evolution ( $\Phi_{O_2}$ ) was calculated according to Eq. (2).

$$\Phi_{O_2} = \frac{J_{\text{ini}} h c N_A}{Q P \lambda (1-T)} \quad (2)$$

where  $J_{\text{ini}}$ ,  $h$ ,  $c$ ,  $N_A$ ,  $Q$ ,  $P$ ,  $\lambda$  and  $T$  are initial current density ( $42 \mu\text{A cm}^{-2}$ ), Plank's constant ( $6.626 \times 10^{-34} \text{ J s}$ ), light velocity ( $2.998 \times 10^8 \text{ m s}^{-1}$ ), Avogadro number ( $6.02 \times 10^{23} \text{ mol}^{-1}$ ), Faradaic constant ( $96,500 \text{ C mol}^{-1}$ ), light intensity ( $15.8 \text{ mW cm}^{-2}$ ), wavelength ( $420 \text{ nm}$ ), and transmittance (0.05). Gas evolved during the photoelectrocatalysis was analyzed on a gas chromatograph (Shimadzu, GC-8A) equipped with a molecular sieve  $5\text{\AA}$  column using argon carrier gas (flow rate is  $40 \text{ cm}^3 \text{ min}^{-1}$ ) at  $323 \text{ K}$ . The  $\text{O}_2$  evolved during photoelectrocatalysis was also detected in the headspace of the gas-tight photoelectrochemical cell by an optics oxygen sensor (FOXY-21G) attached to a multifrequency phase fluorometer (NeoFox). The equipment for photoelectrochemical experiment is shown in the following photograph.

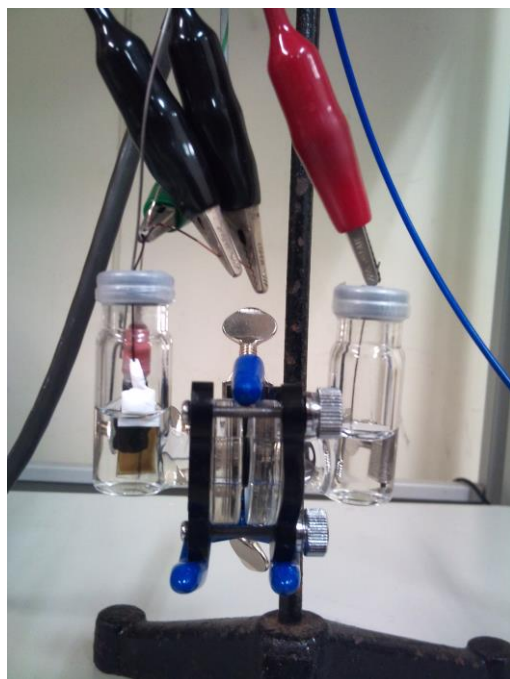

### Characterization of the pre-treated solution.

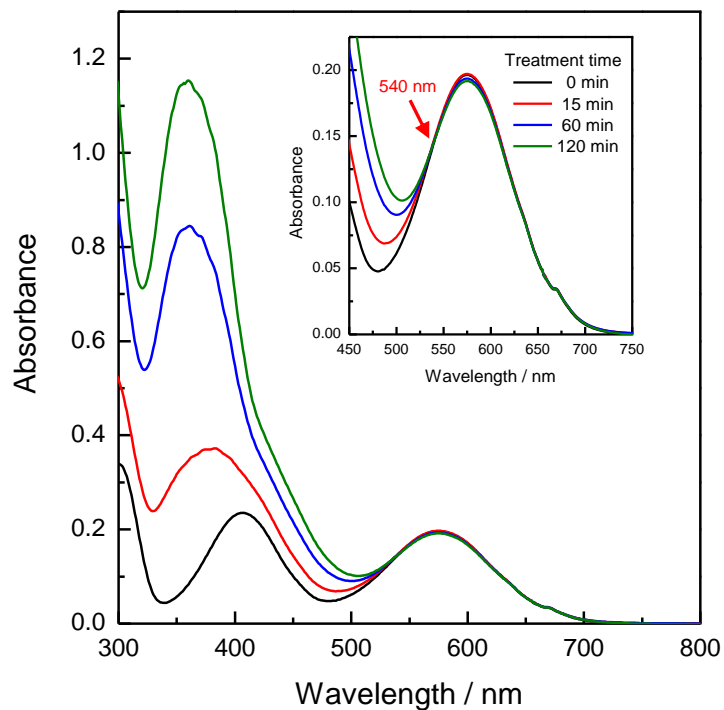

Figure S1 UV-visible absorption spectral change of a 0.14 mol L<sup>-1</sup> aqueous chromium (III) nitrate solution (10 mL) by cathodic polarization of a platinum plate at -0.74 V vs. Ag/AgCl during the pre-treatment. Two absorption bands at 410 and 580 nm are assigned to  ${}^4A_{2g} \rightarrow {}^4T_{1g}$  and  ${}^4T_{2g}$  d-d transition of Cr<sup>III</sup> ions, respectively (*J. Catal.* 1996, **158**, 236-250.).

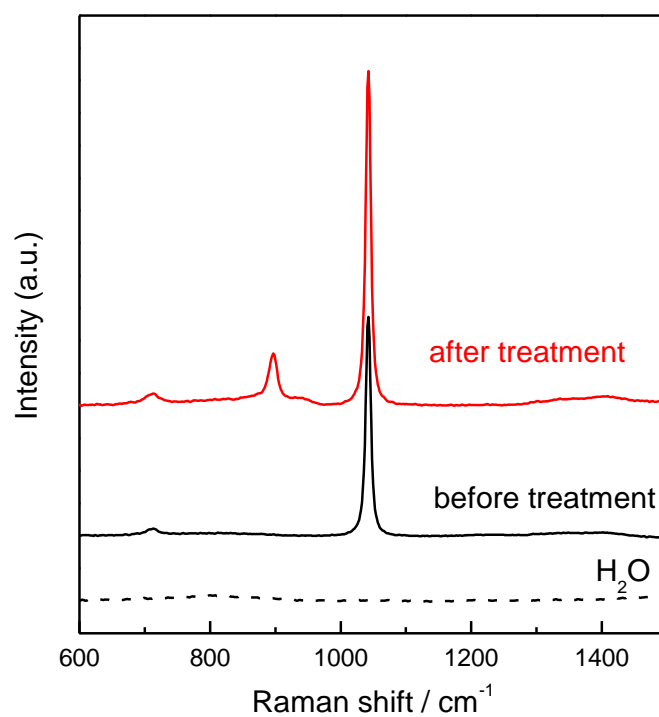

Figure S2 Raman spectra of an aqueous  $\text{Cr}(\text{NO}_3)_3$  solution before (black) and after (red) the cathodic treatment (polarization of a platinum plate at  $-0.74$  V vs. Ag/AgCl for 2 h), and blank spectrum (black dashed line) without  $\text{Cr}(\text{NO}_3)_3$ .

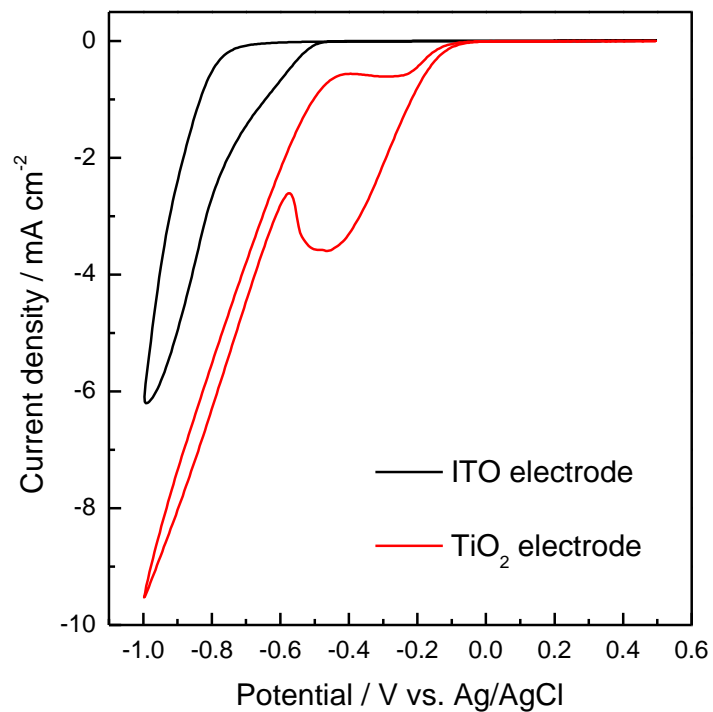

Figure S3 Cyclic voltammograms (CVs) of an ITO electrode (black) and a TiO<sub>2</sub> electrode (red) in the pre-treated aqueous Cr(NO<sub>3</sub>)<sub>3</sub> solution (polarization of a platinum plate at -0.74 V vs. Ag/AgCl for 2 h).

## 2. Characterization of the $\text{Cr}^{\text{III}}_x\text{O}_y$ -deposited $\text{TiO}_2$ electrode.

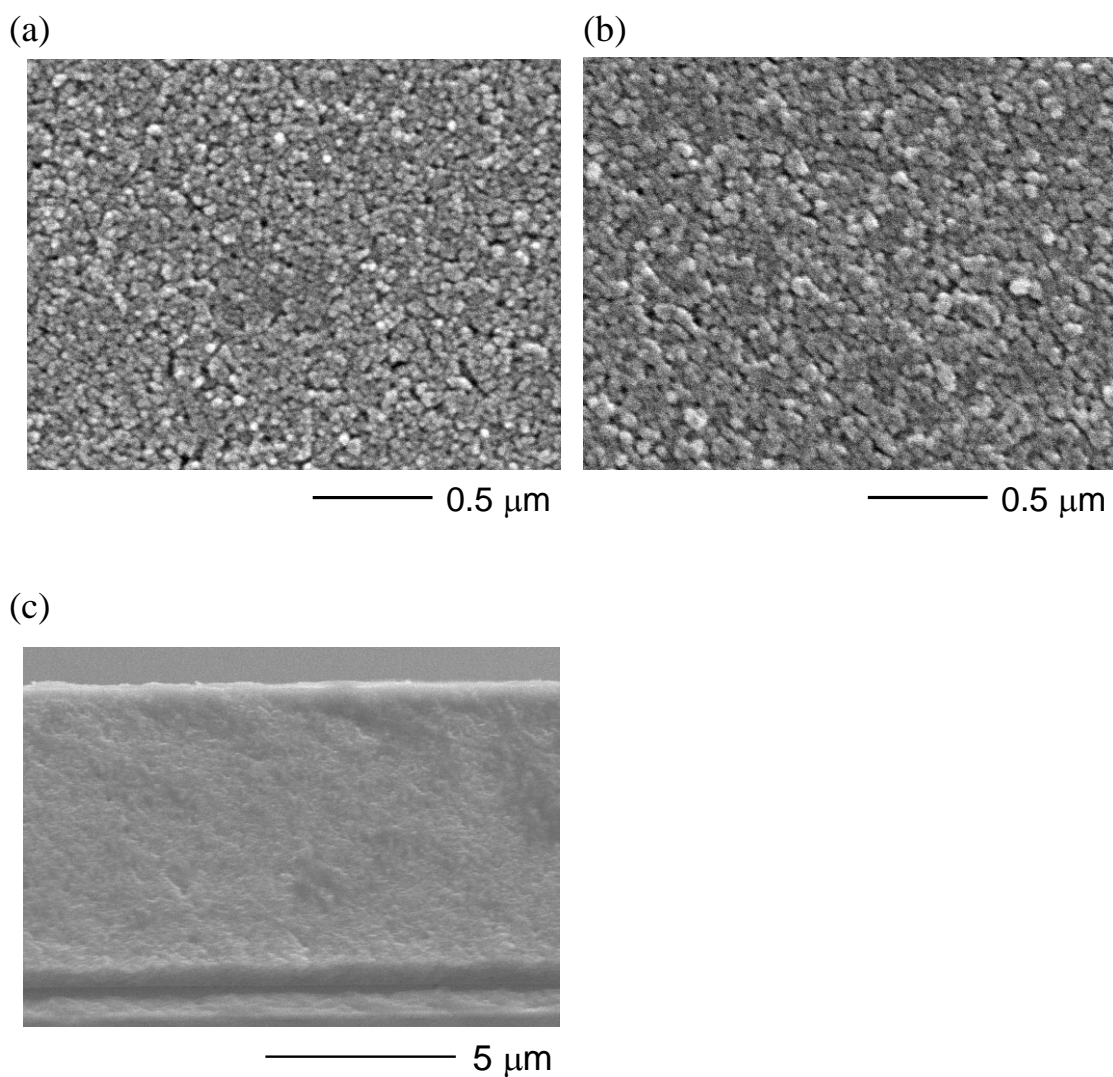

Figure S4 Scanning electron microscopic (SEM) images of (a) a neat  $\text{TiO}_2$  electrode surface, (b) a  $\text{Cr}^{\text{III}}_x\text{O}_y$ -deposited  $\text{TiO}_2$  electrode surface. (c) cross-sectional SEM image of a  $\text{Cr}^{\text{III}}_x\text{O}_y$ -deposited  $\text{TiO}_2$  electrode. The film thickness (8  $\mu\text{m}$ ) of the  $\text{Cr}^{\text{III}}_x\text{O}_y$ -deposited  $\text{TiO}_2$  electrode is nearly the same as that of the neat  $\text{TiO}_2$  electrode for the SEM observation



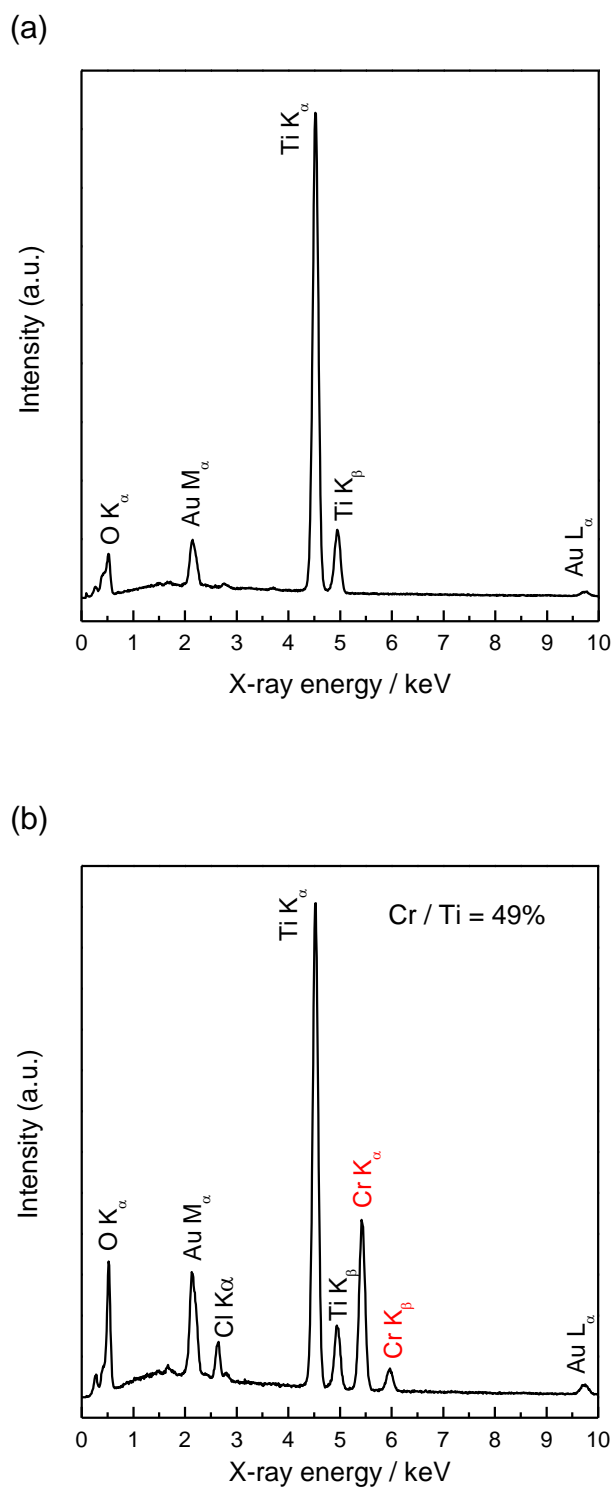

Figure S5 EDS spectra of (a) a  $\text{TiO}_2$  electrode and (b) a  $\text{Cr}^{\text{III}}_x\text{O}_y$ -deposited  $\text{TiO}_2$  electrode. The ratio in atom number of Cr / Ti on the  $\text{Cr}^{\text{III}}_x\text{O}_y$ -deposited  $\text{TiO}_2$  electrode is 49%.

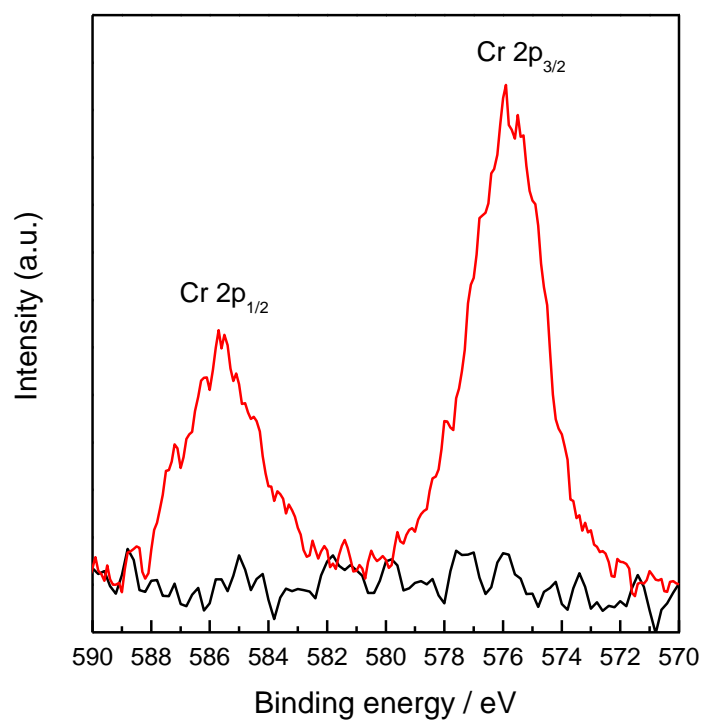

Figure S6 X-ray photoelectron spectra (XPS) of a TiO<sub>2</sub> electrode (black) and a Cr<sup>III</sup><sub>x</sub>O<sub>y</sub>-deposited TiO<sub>2</sub> electrode (red). It was prepared by cathodic polarization in the pre-treated aqueous Cr(NO<sub>3</sub>)<sub>3</sub> solution (0.14 mol L<sup>-1</sup>) at -0.74 V vs. Ag/AgCl for 6 h. The peaks at 585.7 and 575.9 eV are assigned to Cr 2p<sub>1/2</sub> and Cr 2p<sub>3/2</sub>, respectively.

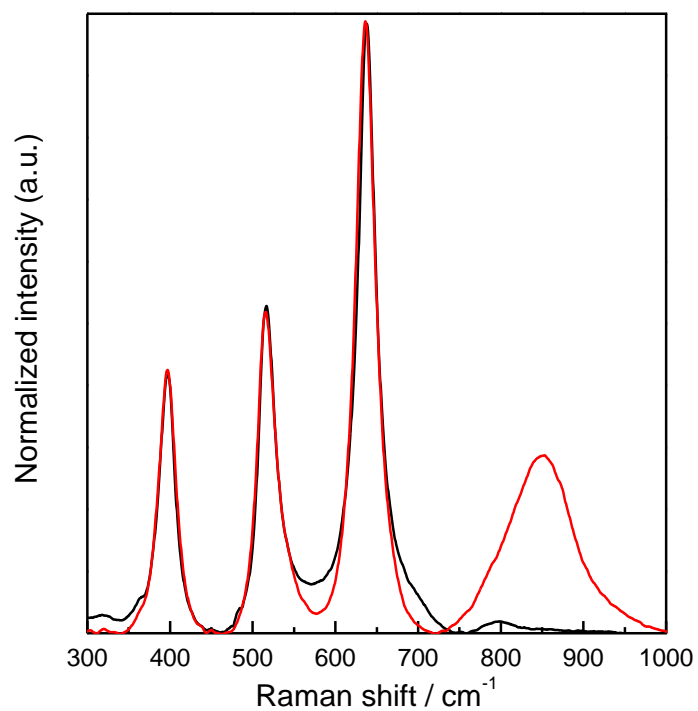

Figure S7 Normalized Raman spectra of a TiO<sub>2</sub> electrode surface (black) and a Cr<sup>III</sup><sub>x</sub>O<sub>y</sub>-deposited TiO<sub>2</sub> electrode (red). It was prepared by cathodic polarization in the pre-treated aqueous Cr(NO<sub>3</sub>)<sub>3</sub> solution (0.14 mol L<sup>-1</sup>) at -0.74 V vs. Ag/AgCl for 6 h. The spectra were normalized at 638 cm<sup>-1</sup>.

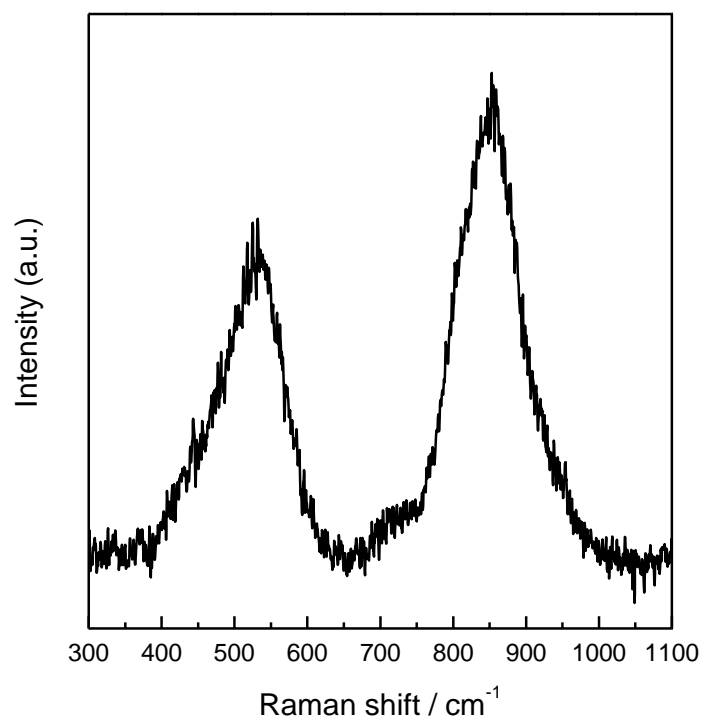

Figure S8 Raman spectrum of a Cr<sub>2</sub>O<sub>3</sub> powder prepared chemically. Two major peaks at 530 cm<sup>-1</sup> and 850 cm<sup>-1</sup> can be assigned to Cr-O vibration energy of Cr<sub>2</sub>O<sub>3</sub> and dehydrated Cr-O vibration of chromium-oxo compounds, respectively.

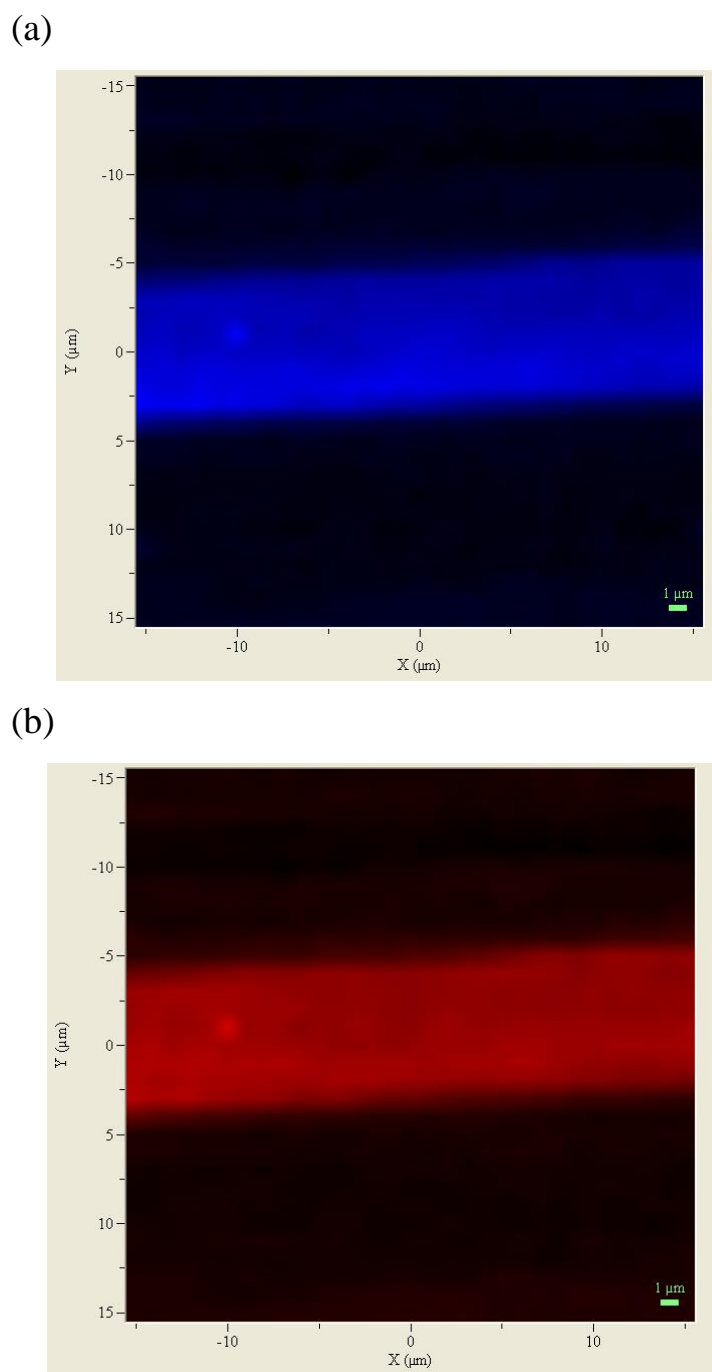

Figure S9 Raman spectral mapping images of a  $\text{Cr}^{\text{III}}_x\text{O}_y$ -deposited  $\text{TiO}_2$  electrode. It was prepared by cathodic polarization in the pre-treated aqueous  $\text{Cr}(\text{NO}_3)_3$  solution ( $0.14 \text{ mol L}^{-1}$ ) at  $-0.74 \text{ V}$  vs.  $\text{Ag}/\text{AgCl}$  for 6 h. (a) Image (blue) due to  $600 - 700 \text{ cm}^{-1}$  based on  $\text{TiO}_2$ , (b) Image (red) due to  $750 - 950 \text{ cm}^{-1}$  based on polychromium-oxo compounds).

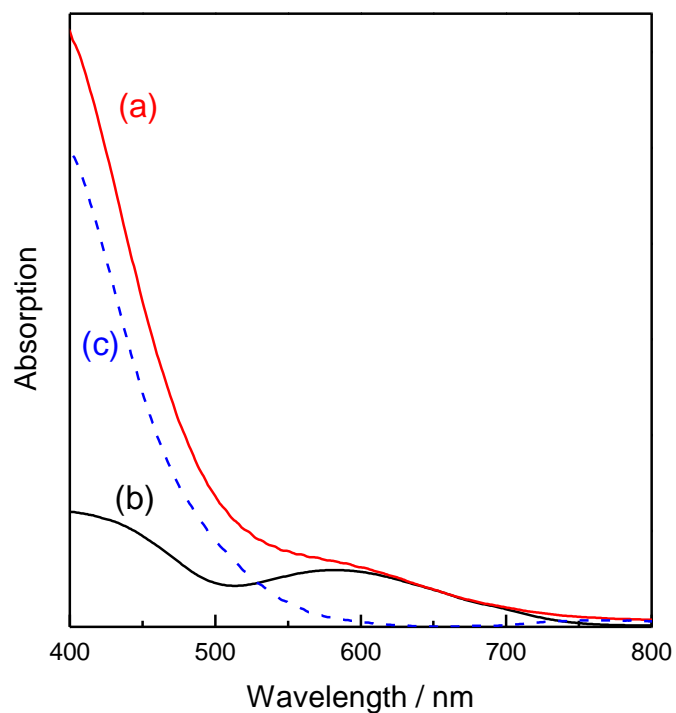

Figure S10 UV-visible diffuse reflection (DR) spectra of (a) a  $\text{Cr}^{\text{III}}_x\text{O}_y$ -deposited  $\text{TiO}_2$  electrode, (b) a  $\text{TiO}_2$  electrode with  $\text{Cr}_2\text{O}_3$  deposited chemically. The spectrum (c) is the difference spectrum of (a) - (b), which is in agreement with the third deconvoluted spectrum assigned to the IFCT transition in Figure 1. The spectra of (a) and (b) were normalized at 660 nm.

#### 4. Photocurrent responses and photoelectrocatalysis on the $\text{Cr}^{\text{III}}_x\text{O}_y$ -deposited $\text{TiO}_2$ electrode.

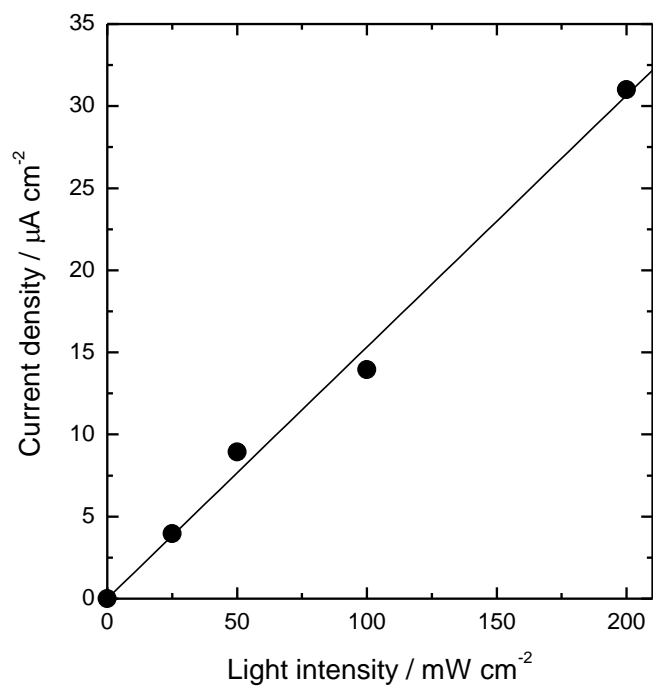

Figure S11 Plots of the photoanodic current at -0.2 V vs. Ag/AgCl versus visible light intensity (light source: a 150 W halogen lamp with a L42 UV-cut-filter ( $\lambda < 420$  nm)).

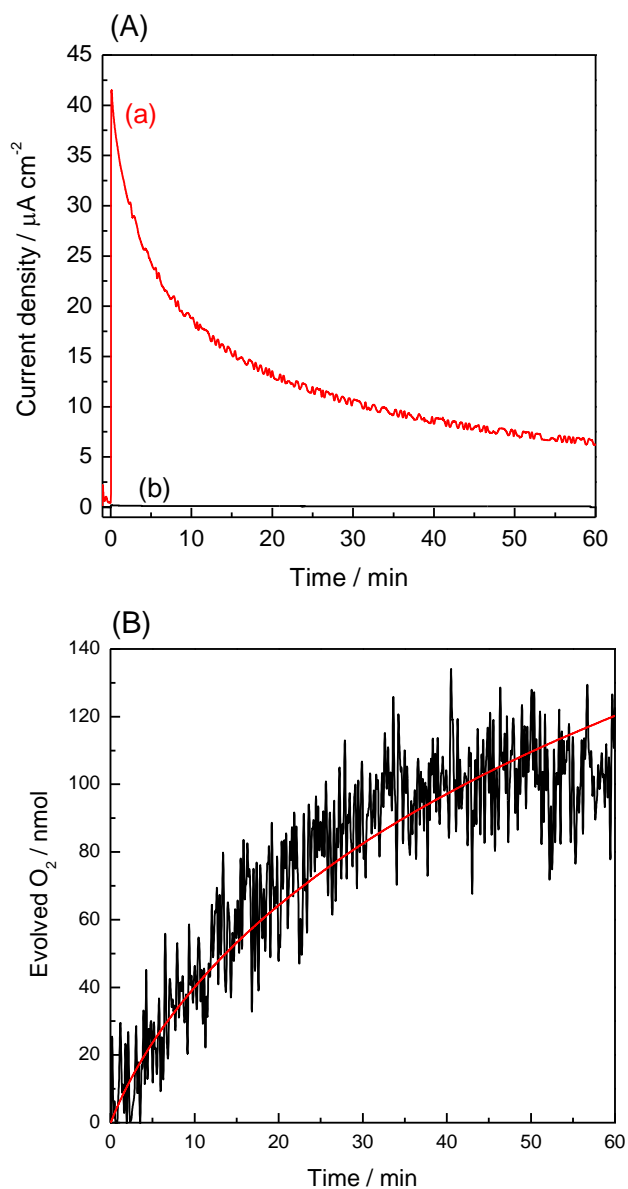

Figure S12 (A) Current density–time curve during the photoelectrolysis at  $-0.2\text{ V}$  vs.  $\text{Ag/AgCl}$  in a  $0.1\text{ mol L}^{-1}$  phosphate buffer solution ( $\text{pH} = 7.0$ ) using (a) a  $\text{Cr}^{\text{III}}_x\text{O}_y$ -deposited  $\text{TiO}_2$  electrode and (b) a  $\text{TiO}_2$  electrode under monochromatic light irradiation ( $420\text{ nm}$ ,  $15.8\text{ mW cm}^{-2}$ ). (B) Time course of the amount of  $\text{O}_2$  evolved during the photoelectrolysis using the  $\text{Cr}^{\text{III}}_x\text{O}_y$ -deposited  $\text{TiO}_2$  electrode. The red line shows the  $\text{O}_2$  amount calculated from the current data in Figure S12 (A).



Table S1 Summary of photoelectrocatalysis data using the  $\text{Cr}^{\text{III}}_x\text{O}_y$ -deposited  $\text{TiO}_2$  electrode at various applied potentials of -0.2 V to -0.5 V vs. Ag/AgCl in a  $0.1 \text{ mol L}^{-1}$  phosphate buffer solution (pH = 7.0) under monochromatic light irradiation ( $420 \text{ nm}, 15.8 \text{ mW cm}^{-2}$ ).

| Applied potential<br>/ V vs. Ag/AgCl | Charge / mC | $\text{O}_2$ / $\mu\text{mol}$ | F.E. $_{\text{O}_2}$ (%) <sup>a)</sup> |
|--------------------------------------|-------------|--------------------------------|----------------------------------------|
| -0.2                                 | 50.7        | 0.12                           | 94                                     |
| -0.3                                 | 36.9        | 0.09                           | 87                                     |
| -0.4                                 | 26.1        | 0.06                           | 82                                     |
| -0.45                                | 13.0        | 0.03                           | 24                                     |
| -0.5                                 | 4.8         | N.D.                           | N.D.                                   |

a) Faradaic efficiency for  $\text{O}_2$  evolution.

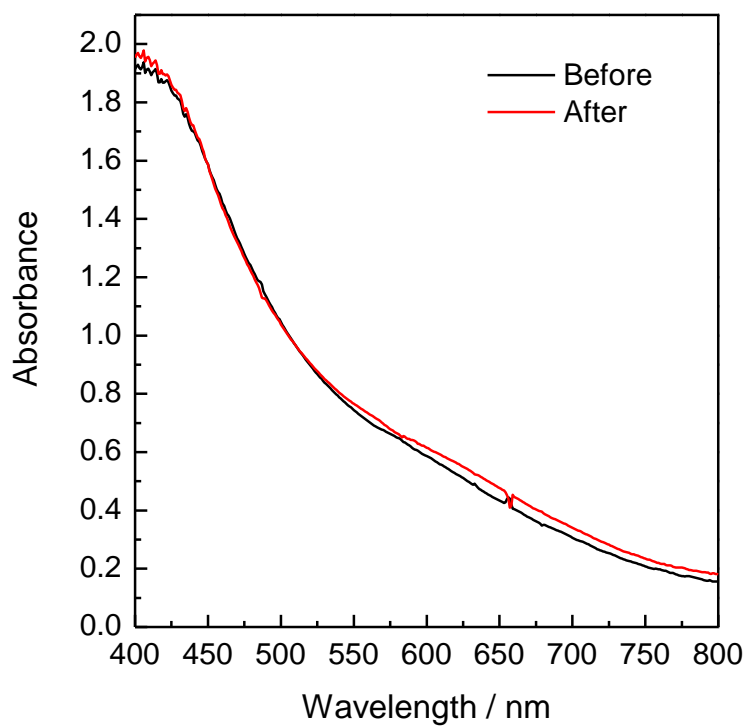

Figure S13 UV-visible absorption spectra of a Cr<sup>III</sup><sub>x</sub>O<sub>y</sub>-deposited TiO<sub>2</sub> electrode before (black) and after (red) the photoelectrocatalysis conducted at -0.2 V vs. Ag/AgCl in a 0.1 mol L<sup>-1</sup> phosphate buffer solution (pH = 7.0) under monochromatic light irradiation (420 nm, 15.8 mW cm<sup>-2</sup>).

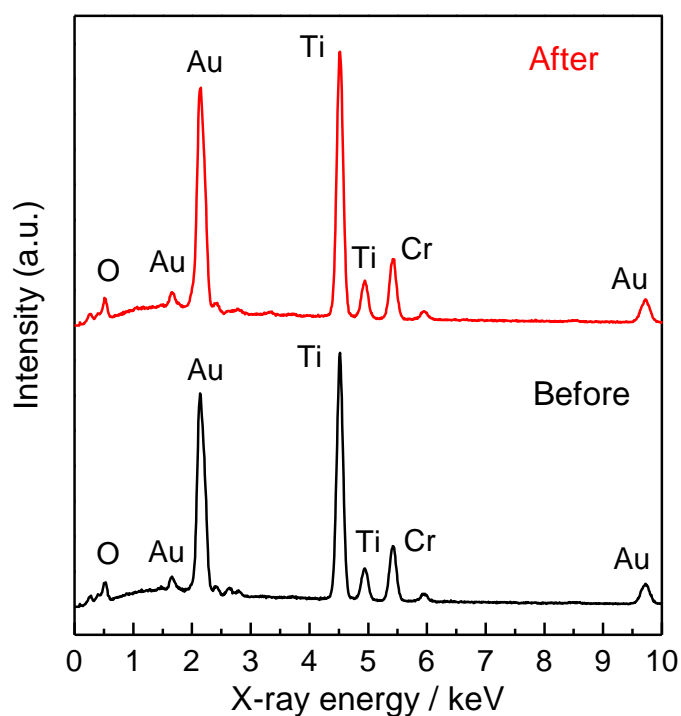

Figure S14 EDS spectra of a  $\text{Cr}^{\text{III}}_x\text{O}_y$ -deposited  $\text{TiO}_2$  electrode before (black) and after (red) the photoelectrocatalysis conducted at  $-0.2$  V vs.  $\text{Ag}/\text{AgCl}$  in a  $0.1 \text{ mol L}^{-1}$  phosphate buffer solution ( $\text{pH} = 7.0$ ) under monochromatic light irradiation ( $420 \text{ nm}$ ,  $15.8 \text{ mW cm}^{-2}$ ). The ratios in atom number of  $\text{Cr} / \text{Ti}$  on the polychromium oxo-electrodeposited  $\text{TiO}_2$  electrode before and after are 49% and 48%, respectively.

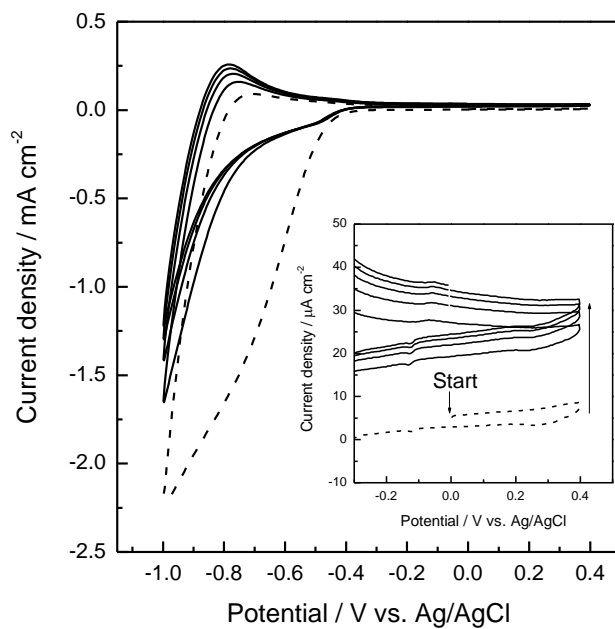

Figure S15 The repetitively-scanned CVs of the  $\text{Cr}^{\text{III}}_x\text{O}_y$ -deposited  $\text{TiO}_2$  electrode after the photoelectrocatalysis in the same buffer solution with the monochromatic light irradiated. Scan rate,  $50 \text{ mV s}^{-1}$ . A dashed line displays the first scan cycle of CV.
